# Supplementary material for: Galvanic replacement of electrodeposited nickel by palladium and investigation of the electrocatalytic activity of synthesized Pd/(Ni) for hydrogen evolution and formic acid oxidation
Source: Royal Society of Chemistry journal article supplement (doi:10.1039/c5ra27219j), 2016-01-01
Supplement: c5ra27219j1.pdf [file c5ra27219j1.pdf]

## Electronic supplementary information (ESI)

### Galvanic replacement of electrodeposited nickel by palladium and investigation of the electrocatalytic activity of synthesized Pd/(Ni) for hydrogen evolution and formic acid oxidation

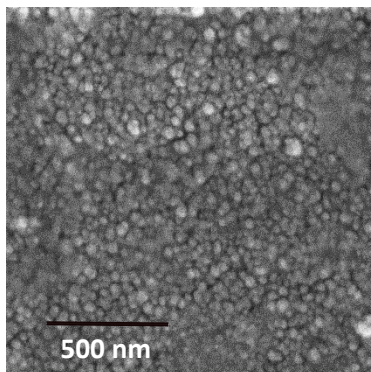

**Fig. S1** FESEM images of and electrodeposited pure Pd film (mass loading:  $0.015 \text{ mg cm}^{-2}$ )

**Table S1** The comparison of mass activity (MA) and specific activity (SA) toward formic acid oxidation at peak potential as well as ECSA corresponding to the galvanically replaced Pd/(Ni) thin film catalyst with best results of some previous works

| Electrocatalyst            | Synthesis method                      | ECSA ( $\text{m}^2 \text{g}^{-1}$ ) | MA ( $\text{A mg}^{-1}$ ) | SA ( $\text{mA cm}^{-2}$ ) | Ref.      |
|----------------------------|---------------------------------------|-------------------------------------|---------------------------|----------------------------|-----------|
| Pd/(Ni) thin film          | Galvanic replacement                  | 31.9                                | 1.39                      | 4.36                       | This work |
| Pd/Ni <sub>2</sub> P/C NPs | Microwave-assisted chemical reduction | 63.6                                | 1.43                      | 2.24                       | 1         |
| Porous Pd NPs              | Chemical reduction                    | 43.8                                | 1.15                      | 2.63                       | 2         |
| Pd NWs                     | Chemical reduction                    | 43.1                                | 1.10                      | 2.55                       | 3         |
| Pd-hollow/C                | Galvanic replacement                  | 15.1                                | 0.96                      | 6.35                       | 4         |
| Pd/CNT                     | Chemical reduction                    | 55.3                                | 0.75                      | 1.36                       | 5         |
| Pd <sub>3</sub> Au/C NPs   | Chemical reduction                    | 95.6                                | 0.52                      | 0.54                       | 6         |
| Pd-Co Nano-assemblies      | Chemical reduction                    | 20.2                                | 0.27                      | 1.32                       | 7         |
| Nano-porous Pd             | Melt spinning/dealloying              | 23.0                                | 0.26                      | 1.13                       | 8         |

#### References

- 1 J. Chang, L. Feng, C. Liu, W. Xing and X. Hu, *Angew. Chemie Int. Ed.*, 2014, **53**, 122–126.
- 2 W. Hong, Y. Fang, J. Wang and E. Wang, *J. Power Sources*, 2014, **248**, 553–559.
- 3 W. Hong, J. Wang and E. Wang, *Int. J. Hydrogen Energy*, 2014, **39**, 3226–3230.
- 4 M. Ren, J. Chen, Y. Li, H. Zhang, Z. Zou, X. Li and H. Yang, *J. Power Sources*, 2014, **246**, 32–38.
- 5 A. B. A. A. Nassr, A. Quetschke, E. Koslowski and M. Bron, *Electrochim. Acta*, 2013, **102**, 202–211.
- 6 S. Lee, N. Jung, J. Cho, H.-Y. Park, J. Ryu, I. Jang, H. Kim, E. Cho, Y. Park, H. C. Ham, J. H. Jang and S. J. Yoo, *ACS Catal.*, 2014, **4**, 2402–2408.
- 7 L. Zhang, L. Wan, Y. Ma, Y. Chen, Y. Zhou, Y. Tang and T. Lu, *Appl. Catal. B, Environ.*, 2013, **138-139**, 229–235.
- 8 X. Wang, W. Wang, Z. Qi, C. Zhao, H. Ji and Z. Zhang, *Electrochem. commun.*, 2009, **11**, 1896–1899.
